# Supplementary material
Source: PubMed Central journal article supplement (PMC2639691)
Supplement: 97320630003100S1.pdf [file 97320630003100S1.pdf]

### Supplementary material

| Botanical names                                                            | Parts used       | Therapeutic actions                                                                                                                                                               |
|----------------------------------------------------------------------------|------------------|-----------------------------------------------------------------------------------------------------------------------------------------------------------------------------------|
| <i>Acorus calamus</i> L. Araceae (Vacha)                                   | Root             | Memory loss, anxiety, bronchitis, mental fatigue sinusitis, tension, headache and joint pains                                                                                     |
| <i>Adhatoda vasica</i> Nees Acanthaceae (Vasaka)                           | Roots and leaves | Expectorant used in asthma, bronchitis, cough and dysmenorrhea.                                                                                                                   |
| <i>Aegle marmelos</i> Corr. Rutaceae (Bilwa)                               | Fruit            | Diarrhea, gastritis and adult onset diabetes                                                                                                                                      |
| <i>Andrographis paniculata</i> Wallich <i>ex</i> Nees. Acanthaceae (Kirta) | Leaves           | Children's bowel complaints, gastric acidity, viral hepatitis, liver congestion and flatulence                                                                                    |
| <i>Asparagus racemosus</i> Willd. Liliaceae (Shatavari)                    | Root             | Increases muscle strength, stomach, lungs, and sexual organs, increases breast milk secretion during lactation and male impotence.                                                |
| <i>Bacopa monnieri</i> (L.) Penn. Scrophulariaceae (Brahmi)                | Leaves           | Nervous exhaustion, generalized fatigue, epilepsy, improves memory, anti-ageing and bronchitis, coughs.                                                                           |
| <i>Boerhaavia diffusa</i> L. Nyctaginaceae (Punarnava)                     | Root             | Diuretic, laxative, expectorant used in asthma, bronchitis, anemia and anti-inflammatory.                                                                                         |
| <i>Cedrus deodara</i> Roxb. Coniferae (Devadaru)                           | Wood             | Flatulence, diarrhoea, hemorrhoids, fever, reduces and promotes sweating.                                                                                                         |
| <i>Centella asiatica</i> Urbann Umbelliferae (Mandukaparni)                | Whole plant      | Anxiety, to promote memory power and also to reduce blood pressure.                                                                                                               |
| <i>Cinnamomum iners</i> Reinw. Lauraceae (Tejpatra)                        | Leaves           | Used for scorpion sting.                                                                                                                                                          |
| <i>Datura metel</i> L. Solanaceae (Datura)                                 | Whole plant      | Whooping cough, muscle spasm, sciatica, asthma and painful menstruation.                                                                                                          |
| <i>Eclipta alba</i> Hassk. Asteraceae (Bhringaraj)                         | Whole plant      | Liver disorders, skin and hair care, improves complexion, viral hepatitis, calms the mind, memory disorders, and strengthens spleen and general tonic.                            |
| <i>Embelia ribes</i> Burm. Myrsinaceae (Vidanga)                           | Powdered berries | Intestinal worms, skin-fungal infections, obesity, sore throat and digestive strengthener. Keep the intestines free of toxins. It is reported as a reducing agent of sperm count. |
| <i>Emblica officinalis</i> Gaertn. Euphorbiaceae (Amalaki)                 | Fruit            | Increases red blood cell counts and therefore improves anemia, asthma, bronchitis, stomach problems and hemorrhoids.                                                              |
| <i>Evolvulus alsinoides</i> L. Convolvulaceae (Shankpushpi)                | Whole plant      | General weakness, nervous exhaustion and memory loss.                                                                                                                             |
| <i>Gloriosa superba</i> L. Liliaceae (Kalapaikilangu)                      | Tuber and seed   | Deadly toxic to human beings, used as server ulcer in an optimum dose and cure cancer.                                                                                            |
| <i>Mucuna pruriens</i> Baker Papilionaceae (Kapikachchha)                  | Seed powder      | Hypercholesterolemia, general weakness, Parkinson's disease and nervous disorders.                                                                                                |
| <i>Ocimum sanctum</i> L. Lamiaceae (Tulasi)                                | Leaves           | Tuberculosis, ringworm, ear infections, common cold, cough, bronchitis, general stress syndrome, skin infections, indigestion, nausea and sinus infection.                        |
| <i>Oroxylum indicum</i> Vent. Bignoniaceae (Shyonaka)                      | Root bark powder | Digestive aid, arthritic conditions, anti-diarrhoea, and purgative.                                                                                                               |
| <i>Operculina turpethum</i> S. Manso (Trivrit)                             | Root             | Constipation and colic obesity.                                                                                                                                                   |
| <i>Phyllanthus amarus</i> L. Euphorbiaceae (Bhumi amalaki)                 | Whole plant      | Chronic liver disorders, jaundice, viral hepatitis, dyspepsia, anorexia moderate constipation, chronic colitis, irritable bowel syndrome, urinary tract infection.                |
| <i>Plumbago zeylanica</i> L. Plumbaginaceae (Chitraka)                     | Root             | Skin conditions, arthritic pain, abortifacient, blood purifier, obesity and hemorrhoids.                                                                                          |
| <i>Ricinus communis</i> L. (Euphorbiaceae)                                 | Seed             | Dysentery, cough, constipation, piles, antivenom to scorpion stings, rheumatis and nerve disorder                                                                                 |
| <i>Rauwolfia serpentina</i> Benth. Apocynaceae (Sarpagandha)               | Root             | High blood pressure, mental agitation, insomnia, sedative, hypnotic. Sarpagandha is the source of reserpine, an anti-hypertensive drug used since 1970.                           |
| <i>Saraca indica</i> L. Caesalpiniaceae (Asoka),                           | Bark             | Menorrhagia, depression, bleeding, hemorrhoids, uterine fibroids, considered as a uterine sedative and tonic.                                                                     |

---

|                                                                     |                |                                                                                                                         |
|---------------------------------------------------------------------|----------------|-------------------------------------------------------------------------------------------------------------------------|
| <i>Sida cordifolia</i> L. Malvaceae (Bala)                          | Root           | Generalized weakness, post-partum weakness, mental exhaustion, nervousness, bronchospasm and cough.                     |
| <i>Solanum surattense</i> Burm.f. Solanaceae (Kantakari)            | Whole plant    | Asthma, cough, bronchospasm, sore throat, constipation, an effective expectorant and diuretic.                          |
| <i>Terminalia bellerica</i> DC. (W & A)<br>Combretaceae (Bibhitaka) | Fruits         | General tonic and strengthener, cough, sore throat, fatigue, all types of gastrointestinal disorders and mild laxative. |
| <i>Tylophora asthmatica</i> W & A<br>Asclepiadaceae (Nanjaruppan)   | Root           | Dry leaf is used to given asthma, tuberculosis and dry cough.                                                           |
| <i>Wedelia calendula</i> (L.) Less. Vitaceae                        | Leaf and root  | Used as hepatic disorders, stomach and lung cancer                                                                      |
| <i>Withania somnifera</i> Dunal. Solanaceae (Amukkura kizhangu)     | Tuber and root | Used for rheumatism and arthritis.                                                                                      |

---

**Table 1:** Therapeutic uses of medicinal and aromatic plants and their parts used in indigenous systems of Indian medicines.  
\*(Reference for the all the plants cited in table 1, Subhose and colleagues, 2005)

| Botanical name                                 | Chemical composition                                     | Therapeutic uses                                                    |
|------------------------------------------------|----------------------------------------------------------|---------------------------------------------------------------------|
| <i>Athradota vasica</i> Nees                   | 1.0% Vasicine<br>2.0% Total alkaloids                    | Anti-asthmatic, Bronchodilator<br>Cold remedy                       |
| <i>Andrographis paniculata</i> Wallich ex Nees | 10% Andrographolides                                     | Hepatoprotectant                                                    |
| <i>Boswellia serrata</i> Roxb.                 | 65% Organic acids<br>20-25% Boswellic acid               | Antiarthritic,<br>Antiinflammatory                                  |
| <i>Boswellia serrata</i> Roxb.                 | 75% Organic acids, 40%<br>Boswellic acid, 20% Sennosides | Antiarthritic,<br>Antiinflammatory and laxative action              |
| <i>Bacopa monniera</i> (L.) Pennell.           | 20% Bacosides A&B                                        | Memory enhancer                                                     |
| <i>Capsicum annum</i> L.                       | 40% Capsaicin, 75% Capsaicin<br>90% Capsaicin            | Pain reliever                                                       |
| <i>Centella asiatica</i> Urb.                  | 8% Total triterpenes                                     | Skin, health weight management                                      |
| <i>Coleus forskohlii</i> Briq. Syn             | 1% Forskohlin                                            | Antihypertensive, weight management                                 |
| <i>Curcuma longa</i> L.                        | Curcumin C3,<br>95% Curcuminoids                         | Antioxidant, anti-viral, anti-<br>inflammatory,<br>anticarcinogenic |
| <i>Emblica officinalis</i> Gaertn.             | 30%Tannins                                               | Detoxification<br>Rejuvenating agent                                |
| <i>Garcinia cambogia</i> Desr.                 | 50% (-) HCA (Ca)                                         | Weight management                                                   |
| <i>Garcinia indica</i> Chois.                  | CitrinO crystalline powder<br>10% (-) HCA                | Beverages, naturally<br>Red in color                                |
| <i>Gymnema sylvestre</i> R. Br.                | Gymnema Sylvestre GS 425%<br>75% Gymnemic acids          | Antidiabetic                                                        |
| <i>Glycyrrhiza glabra</i> L.                   | 20% Glycyrrhizinic acid<br>5% Lutein                     | Eyesight-age related<br>Macular degeneration                        |
| <i>Camellia sinensis</i> (L.) Kuntze           | 40% Catechins; 75% Catechins<br>2% Caffeine              | Antioxidant                                                         |
| <i>Commiphora mukul</i> Engl.                  | Gugulipid<br>2.5% Guggulsterones Z&E                     | Cholesterol<br>Management                                           |
| <i>Momordica charantia</i> L.                  | 7% Bitter principles<br>0.5% Charantin                   | Antidiabetic                                                        |
| <i>Morinda citrifolia</i> L.                   | Fruit Powder                                             | General tonic                                                       |
| <i>Mucuna pruriens</i> Baker                   | 10% & 15% L-Dopa<br>Min. 20% Catecholamines              | Nerve tonic<br>Energy                                               |
| <i>Melia azadirachta</i> L.                    | 3% Bitter Principles                                     | Anti-bacterial                                                      |
| <i>Phyllanthus amarus</i> L.                   | 0.02% Phyllanthine &<br>Hypophyllanthine                 | Anti-hepatitis                                                      |
| <i>Picrorhiza kurroa</i> Royle ex Benth.,      | 4% Kutkin                                                | Hepatoprotectant                                                    |
| <i>Piper nigrum</i> L.                         | 95% Piperine                                             | Nutrient bio-availability<br>Enhancer                               |
| <i>Piper longum</i> L.                         | 1.5% Piperine                                            | Biopotentiator, Ant-asthmatic<br>Thermogenic                        |
| <i>Rubia cordifolia</i> L.                     | 4:1 Concentration                                        | Skin disorders                                                      |
| <i>Sida cordifolia</i> L.                      | 0.8% Ephedrine<br>10% Isoflavones                        | Bronchodilator<br>Anti-carcinogenic                                 |
| <i>Terminalia arjuna</i> W. & A.               | 1% Arjunolic acid                                        | Revitalizing, circulation                                           |
| <i>Terminalia bellerica</i> Roxb.              | 35% Tannins                                              | Rejuvenating agent                                                  |
| <i>Terminalia chebula</i> Retz.                | 30% Tannins                                              |                                                                     |
| <i>Tinospora cordifolia</i> Miers              | 2.5% Bitter principles                                   | Diuretic                                                            |
| <i>Tribulus terrestris</i> L.                  | 20% Steroidal saponins<br>45% Steroidal saponins         | Muscle building,<br>Anabolic alternative                            |
| <i>Ocimum sanctum</i> L.                       | 2% Ursolic acid                                          | Antidiabetic<br>Stress management                                   |
| <i>Tylophora asthmatica</i> W. & A.            | 0.1% Total alkaloids                                     | Anti-asthmatic                                                      |
| <i>Withania somnifera</i> (L.) Dunal           | .5% Withanolides, 1.0%<br>Alkaloids, 0.25% Withaferin    | Herbal adaptogen                                                    |
| <i>Zingiber officinale</i> (Willd.)Rosc.       | 5% Gingerols                                             | Digestive aid<br>Ginger soft extract                                |

**Table 2:** The pharmacological properties of some Ayurvedic crude drugs support for their therapeutic claims.

| Botanical names                                       | Parts used       | Vernacular names |
|-------------------------------------------------------|------------------|------------------|
| <i>Acorus calamus</i> L. (Araceae)                    | Rhizome          | Vacha            |
| <i>Argemone mexicana</i> L. (Papaveraceae)            | Fruit            | Datura.          |
| <i>Curcuma amada</i> L. (Scitamineae)                 | Rhizome          | Amba haldi       |
| <i>Curcuma longa</i> L. (Scitamineae)                 | Rhizome          | Haldi            |
| <i>Curcuma aromatica</i> Salish (Scitamineae)         | Wild turmeric    | Jangali haldi    |
| <i>Cassia lanceolata</i> L. (Forsk) (Caceslpiniaceae) | Leaves           | Thalispatri      |
| <i>Glycyrrhiza glabra</i> L. (Papilionaceae)          | Root             | Jestimadhu       |
| <i>Ipomaea hederacea</i> Jacq. (Convolvulaceae)       | Pharbitis        | Kala dana        |
| <i>Withania somnifera</i> Dunal. (Solanaceae)         | Vegetable rennet | Aswagandha       |
| <i>Myrica nagi</i> Thunb. (Myricaceae)                | Leaf             | Kaifal           |
| <i>Nardostachys jatamansi</i> DC. (Valerianaceae)     | Whole plant      | Jadamanshi       |
| <i>Nigella sativa</i> L. (Ranunculaceae)              | Seed             | Kalajeera        |
| <i>Ptychotis ajowan</i> DC. (Umbelliferae)            | Leaf             | Ajwain           |
| <i>Piper longum</i> L. (Piperaceae)                   | Fruit            | Adamkath         |
| <i>Rubia cordifolia</i> L. (Rubiaceae)                | Madder root      | Medhamahmeda     |
| <i>Sapindus trifoliatu</i> s L. (Sapindaceae)         | Indian fiber     | Sonth (dried)    |
| <i>Symplocos racemosa</i> Roxb. (Styraceae)           | Bark             | Majithlall       |
| <i>Swertia chirata</i> Ham. (Gentianaceae)            | Whole plant      | Chiraita         |
| <i>Terminalia chebula</i> Retz. (Combretaceae)        | Bark and seed    | Harda chota      |
| <i>Zingiber officinale</i> Roseoe (Gingiferaceae)     | Rhizome          | Adrak (fresh)    |

**Table 3:** Medicinal plant parts exported from India.
